# Supplementary material
Source: PubMed Central journal article supplement (PMC8281579)
Supplement: NIHMS1699152-supplement-Supplemental_Material.pdf [file NIHMS1699152-supplement-Supplemental_Material.pdf]

**Appendix 1.** Search strategies for all databases. All searches were conducted on January 14, 2020. Search update was conducted on September 16, 2020. Date limits of 1990-2020 were used.

**Search 1 (original):** January 14, 2020.

| Database        | Search strategy                                                                                                                                                                                                                                                                                                                                                                                                                                                                                                                                                                                                                                                                                                                                                                                             | Number of results |
|-----------------|-------------------------------------------------------------------------------------------------------------------------------------------------------------------------------------------------------------------------------------------------------------------------------------------------------------------------------------------------------------------------------------------------------------------------------------------------------------------------------------------------------------------------------------------------------------------------------------------------------------------------------------------------------------------------------------------------------------------------------------------------------------------------------------------------------------|-------------------|
| PubMed (1966- ) | (incarcerat* OR<br>probation[tiab] OR<br>“community supervised”[tiab]<br>OR arrest[tiab] OR<br>arrested[tiab] OR<br>detention[tiab] OR<br>detained[tiab] OR jail[tiab]<br>OR jailed[tiab] OR jails[tiab]<br>OR corrections[tiab] OR<br>correctional[tiab] OR<br>offender[tiab] OR<br>offenders[tiab] OR<br>reoffending[tiab] OR<br>justice[tiab] OR justice-<br>involved[tiab] OR<br>diversion[tiab] OR<br>diverted[tiab] OR<br>imprisoned[tiab] OR<br>"Juvenile<br>Delinquency"[Mesh] OR<br>court-involved[tiab] OR<br>"juvenile court"[tiab] OR<br>"family court"[tiab] OR<br>cross-over[tiab] OR<br>crossover[tiab] OR "training<br>school"[tiab] OR "group<br>home"[tiab] OR "residential<br>placement"[tiab])<br><br>AND<br><br>(teen[tiab] OR teens[tiab] OR<br>teenager[tiab] OR<br>teenage[tiab] OR | 253               |

|                                   |                                                                                                                                                                                                                                                                                                                                                                                                                                                                                                                                                                                                                                                                                                                                                |            |
|-----------------------------------|------------------------------------------------------------------------------------------------------------------------------------------------------------------------------------------------------------------------------------------------------------------------------------------------------------------------------------------------------------------------------------------------------------------------------------------------------------------------------------------------------------------------------------------------------------------------------------------------------------------------------------------------------------------------------------------------------------------------------------------------|------------|
|                                   | <p>teenaged[tiab] OR<br/> teenagers[tiab] OR<br/> adolescent[tiab] OR<br/> adolescence[tiab] OR<br/> adolescents[tiab] OR “young<br/> adult”[tiab] OR children[tiab]<br/> OR child[tiab] OR youth[tiab]<br/> OR youthful[tiab] OR<br/> juvenile[tiab] OR youths[tiab]<br/> OR juveniles[tiab] OR<br/> "young people"[tiab])</p> <p>AND</p> <p>("Adverse Childhood<br/> Experiences"[Mesh] OR<br/> "Adult Survivors of Child<br/> Adverse Events"[Mesh] OR<br/> "adverse childhood<br/> experience"[tiab] OR<br/> "adverse childhood<br/> experiences"[tiab] OR<br/> aces[tiab] OR "childhood<br/> trauma"[tiab] OR "adverse<br/> childhood event"[tiab] OR<br/> "adverse childhood<br/> events"[tiab] OR "childhood<br/> adversity"[tiab])</p> |            |
| <p>PsycINFO (ProQuest, 1887-)</p> | <p>ti((MAINSUBJECT.EXACT(<br/> "Juvenile Delinquency") OR<br/> incarcerat* OR probation OR<br/> “community supervised” OR<br/> arrest OR arrested OR<br/> detention OR detained OR jail<br/> OR jailed OR jails OR<br/> corrections OR correctional<br/> OR offender OR offenders<br/> OR reoffending OR justice<br/> OR justice-involved OR</p>                                                                                                                                                                                                                                                                                                                                                                                               | <p>318</p> |

|  |                                                                                                                                                                                                                                                                                                                                                                                                                                                                                                                                                                                                                                                                                                                                                                                                                                                                                                                                                                                                                      |  |
|--|----------------------------------------------------------------------------------------------------------------------------------------------------------------------------------------------------------------------------------------------------------------------------------------------------------------------------------------------------------------------------------------------------------------------------------------------------------------------------------------------------------------------------------------------------------------------------------------------------------------------------------------------------------------------------------------------------------------------------------------------------------------------------------------------------------------------------------------------------------------------------------------------------------------------------------------------------------------------------------------------------------------------|--|
|  | <p>diversion OR diverted OR imprisoned OR court-involved OR "juvenile court" OR "family court" OR cross-over OR crossover OR "training school" OR "group home" OR "residential placement" ) AND ti((teen OR teens OR teenager OR teenage OR teenaged OR teenagers OR adolescent OR adolescence OR adolescents OR "young adult" OR children OR child OR youth OR youthful OR juvenile OR youths OR juveniles OR "young people" ) AND ti((MAINSUBJECT.EXACT("Childhood Adversity") OR "adverse childhood experience" OR "adverse childhood experiences" OR acs OR "childhood trauma" OR "adverse childhood event" OR "adverse childhood events" OR "childhood adversity")) OR ab((MAINSUBJECT.EXACT("Juvenile Delinquency") OR incarcerat* OR probation OR "community supervised" OR arrest OR arrested OR detention OR detained OR jail OR jailed OR jails OR corrections OR correctional OR offender OR offenders OR reoffending OR justice OR justice-involved OR diversion OR diverted OR imprisoned OR court-</p> |  |
|--|----------------------------------------------------------------------------------------------------------------------------------------------------------------------------------------------------------------------------------------------------------------------------------------------------------------------------------------------------------------------------------------------------------------------------------------------------------------------------------------------------------------------------------------------------------------------------------------------------------------------------------------------------------------------------------------------------------------------------------------------------------------------------------------------------------------------------------------------------------------------------------------------------------------------------------------------------------------------------------------------------------------------|--|

|                        |                                                                                                                                                                                                                                                                                                                                                                                                                                                                                                                                                                                                                                  |            |
|------------------------|----------------------------------------------------------------------------------------------------------------------------------------------------------------------------------------------------------------------------------------------------------------------------------------------------------------------------------------------------------------------------------------------------------------------------------------------------------------------------------------------------------------------------------------------------------------------------------------------------------------------------------|------------|
|                        | <p>involved OR "juvenile court" OR "family court" OR cross-over OR crossover OR "training school" OR "group home" OR "residential placement" ) AND ab((teen OR teens OR teenager OR teenage OR teenaged OR teenagers OR adolescent OR adolescence OR adolescents OR "young adult" OR children OR child OR youth OR youthful OR juvenile OR youths OR juveniles OR "young people" ) AND ab((MAINSUBJECT.EXACT ("Childhood Adversity") OR "adverse childhood experience" OR "adverse childhood experiences" OR acs OR "childhood trauma" OR "adverse childhood event" OR "adverse childhood events" OR "childhood adversity"))</p> |            |
| <p>Embase (1947- )</p> | <p>('juvenile delinquency'/exp OR incarcerat* OR probation:ti,ab OR "community supervised":ti,ab OR arrest:ti,ab OR arrested:ti,ab OR detention:ti,ab OR detained:ti,ab OR jail:ti,ab OR jailed:ti,ab OR jails:ti,ab OR corrections:ti,ab OR correctional:ti,ab OR offender:ti,ab OR offenders:ti,ab OR reoffending:ti,ab OR</p>                                                                                                                                                                                                                                                                                                 | <p>245</p> |

justice:ti,ab OR justice-  
involved:ti,ab OR  
diversion:ti,ab OR  
diverted:ti,ab OR  
imprisoned:ti,ab OR court-  
involved:ti,ab OR "juvenile  
court":ti,ab OR "family  
court":ti,ab OR cross-  
over:ti,ab OR crossover:ti,ab  
OR "training school":ti,ab OR  
"group home":ti,ab OR  
"residential placement":ti,ab)

AND

(teen:ti,ab OR teens:ti,ab OR  
teenager:ti,ab OR  
teenage:ti,ab OR  
teenaged:ti,ab OR  
teenagers:ti,ab OR  
adolescent:ti,ab OR  
adolescence:ti,ab OR  
adolescents:ti,ab OR "young  
adult":ti,ab OR children:ti,ab  
OR child:ti,ab OR youth:ti,ab  
OR youthful:ti,ab OR  
juvenile:ti,ab OR youths:ti,ab  
OR juveniles:ti,ab OR "young  
people":ti,ab)

AND

('childhood adversity'/mj OR  
"adverse childhood  
experience":ti,ab OR "adverse  
childhood experiences":ti,ab  
OR aces:ti,ab OR "childhood  
trauma":ti,ab OR "adverse  
childhood event":ti,ab OR  
"adverse childhood

|                                                    |                                                                                                                                                                                                                                                                                                                                                                                                                                                                                                                                                                                                                                                                                                                                          |     |
|----------------------------------------------------|------------------------------------------------------------------------------------------------------------------------------------------------------------------------------------------------------------------------------------------------------------------------------------------------------------------------------------------------------------------------------------------------------------------------------------------------------------------------------------------------------------------------------------------------------------------------------------------------------------------------------------------------------------------------------------------------------------------------------------------|-----|
|                                                    | events":ti,ab OR "childhood adversity":ti,ab)                                                                                                                                                                                                                                                                                                                                                                                                                                                                                                                                                                                                                                                                                            |     |
| Web of Science (1900- )                            | <p>(incarcerat* OR probation OR "community supervised" OR arrest OR arrested OR detention OR detained OR jail OR jailed OR jails OR corrections OR correctional OR offender OR offenders OR reoffending OR justice OR justice-involved OR diversion OR diverted OR imprisoned)</p> <p>AND</p> <p>(teen OR teens OR teenager OR teenage OR teenaged OR teenagers OR adolescent OR adolescence OR adolescents OR "young adult" OR children OR child OR youth OR youthful OR juvenile OR youths OR juveniles OR "young people")</p> <p>AND</p> <p>("adverse childhood experience" OR "adverse childhood experiences" OR aces OR "childhood trauma" OR "adverse childhood event" OR "adverse childhood events" OR "childhood adversity")</p> | 416 |
| Sociological Abstracts & Social Services Abstracts | ti(((MAINSUBJECT.EXACT ("Juvenile Delinquency") OR                                                                                                                                                                                                                                                                                                                                                                                                                                                                                                                                                                                                                                                                                       | 132 |

(ProQuest, 1963- and 1980- ,  
searched together)

incarcerat\* OR probation OR  
"community supervised" OR  
arrest OR arrested OR  
detention OR detained OR jail  
OR jailed OR jails OR  
corrections OR correctional  
OR offender OR offenders  
OR reoffending OR justice  
OR justice-involved OR  
diversion OR diverted OR  
imprisoned OR court-  
involved OR "juvenile court"  
OR "family court" OR cross-  
over OR crossover OR  
"training school" OR "group  
home" OR "residential  
placement") AND (teen OR  
teens OR teenager OR  
teenage OR teenaged OR  
teenagers OR adolescent OR  
adolescence OR adolescents  
OR "young adult" OR  
children OR child OR youth  
OR youthful OR juvenile OR  
youths OR juveniles OR  
"young people") AND  
("adverse childhood  
experience" OR "adverse  
childhood experiences" OR  
aces OR "childhood trauma"  
OR "adverse childhood  
event" OR "adverse  
childhood events" OR  
"childhood adversity")) OR  
ab(((MAINSUBJECT.EXAC  
T("Juvenile Delinquency")  
OR incarcerat\* OR probation  
OR "community supervised"  
OR arrest OR arrested OR  
detention OR detained OR jail  
OR jailed OR jails OR  
corrections OR correctional  
OR offender OR offenders  
OR reoffending OR justice  
OR justice-involved OR  
diversion OR diverted OR

|                                    |                                                                                                                                                                                                                                                                                                                                                                                                                                                                                                                                                                                          |      |
|------------------------------------|------------------------------------------------------------------------------------------------------------------------------------------------------------------------------------------------------------------------------------------------------------------------------------------------------------------------------------------------------------------------------------------------------------------------------------------------------------------------------------------------------------------------------------------------------------------------------------------|------|
|                                    | imprisoned OR court-involved OR "juvenile court" OR "family court" OR crossover OR crossover OR "training school" OR "group home" OR "residential placement") AND (teen OR teens OR teenager OR teenage OR teenaged OR teenagers OR adolescent OR adolescence OR adolescents OR "young adult" OR children OR child OR youth OR youthful OR juvenile OR youths OR juveniles OR "young people") AND ("adverse childhood experience" OR "adverse childhood experiences" OR aces OR "childhood trauma" OR "adverse childhood event" OR "adverse childhood events" OR "childhood adversity")) |      |
| Google Scholar                     | (juvenile justice OR "juvenile offenders" OR "justice-involved youth" OR "court-involved youth") AND ("adverse childhood experiences" OR "adverse childhood experience" OR aces OR "adverse childhood events" OR childhood adversity")                                                                                                                                                                                                                                                                                                                                                   | 50   |
| Total number of results            |                                                                                                                                                                                                                                                                                                                                                                                                                                                                                                                                                                                          | 1414 |
| Total number of duplicates         |                                                                                                                                                                                                                                                                                                                                                                                                                                                                                                                                                                                          | 646  |
| Total results after de-duplication |                                                                                                                                                                                                                                                                                                                                                                                                                                                                                                                                                                                          | 768  |

**Search 2 (update):** September 16, 2020. Search strategies above were used with date limits from January 15, 2020 – September 16, 2020.



| <b>Database</b>                                                                                    | <b>Number of results</b> |
|----------------------------------------------------------------------------------------------------|--------------------------|
| PubMed (1966- )                                                                                    | 40                       |
| PsycINFO (ProQuest, 1887- )                                                                        | 20                       |
| Embase (1947- )                                                                                    | 34                       |
| Web of Science (1900- )                                                                            | 91                       |
| Sociological Abstracts & Social Services Abstracts (ProQuest, 1963- and 1980- , searched together) | 7                        |
| Google Scholar                                                                                     | 50                       |
| Additional sources                                                                                 | 1                        |
| Total                                                                                              | 243                      |
| Number of duplicates                                                                               | 113                      |
| <b>Total after de-duplication</b>                                                                  | <b>130</b>               |
